# Supplementary material for: ESBR Nanocomposites Filled with Monodisperse Silica Modified with Si747: The Effects of Amount and pH on Performance
Source: MDPI journal article supplement (doi:10.3390/polym15040981), 2023-02-16
Supplement: s1 [file s1]

# ESBR Nanocomposites Filled with Monodisperse Silica Modified with Si747: The Effects of Amount and pH on Performance

Lijian Xia <sup>1,2</sup>, Anmin Tao <sup>1</sup>, Jinyun Cui <sup>1</sup>, Abin Sun <sup>1</sup>, Ze Kan <sup>1,\*</sup> and Shaofeng Liu <sup>1</sup>

<sup>1</sup> Key Laboratory of Biobased Polymer Materials, Shandong Provincial Education Department, School of Polymer Science and Engineering, Qingdao University of Science and Technology, Qingdao 266042, China

<sup>2</sup> State Key Laboratory of Marine Coatings, Marine Chemical Research Institute Co., Ltd., Qingdao 266072, China

\* Correspondence: zkan@qust.edu.cn

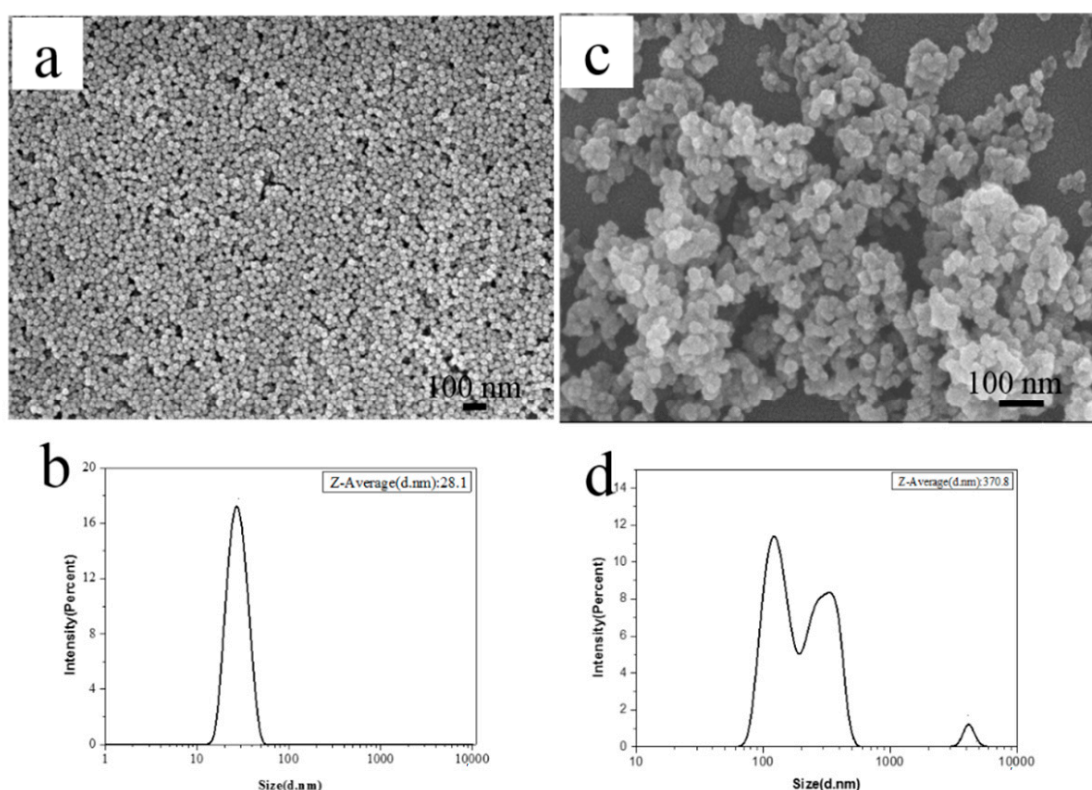

**Figure S1.** SEM images and corresponding DLS results of silica particles; (a) AS; (b) the corresponding DLS results of AS with single peak and average size of 28 nm; (c) PS; and (d) the corresponding DLS results of PS with multiple peaks and average size of 370 nm.

**Table S1.** The shear storage modulus difference  $\Delta G'$  of ESBR compounds filled with monodisperse silica before and after modification

| Sample                 | Pure AS-R | 8%-AS-R | 10%-AS-R | 12%-AS-R | 15%-AS-R | 20%-AS-R |
|------------------------|-----------|---------|----------|----------|----------|----------|
| $\Delta G'/\text{KPa}$ | 770.56    | 381.17  | 322.9    | 295.38   | 279.43   | 294.27   |

**Table S2.** The shear storage modulus difference  $\Delta G'$  of ESBR compounds filled with precipitated silica before and after modification

| Sample | Pure PS-R | 10%-PS-R | 12%-PS-R | 15%-PS-R | 20%-PS-R |
|--------|-----------|----------|----------|----------|----------|
|--------|-----------|----------|----------|----------|----------|

|                        |        |        |        |        |        |
|------------------------|--------|--------|--------|--------|--------|
| $\Delta G'/\text{KPa}$ | 911.29 | 508.84 | 446.46 | 445.61 | 435.28 |
|------------------------|--------|--------|--------|--------|--------|

Table S3. The shear storage modulus difference  $\Delta G'$  of ESBR compounds filled with silica modified at different pH

| Sample                 | 15%-AS<br>@3-R | 15%-AS<br>@7-R | 15%-AS<br>@9-R | 15%-AS<br>@12-R | 20%-PS<br>@7-R | 20%-PS<br>@9-R |
|------------------------|----------------|----------------|----------------|-----------------|----------------|----------------|
| $\Delta G'/\text{KPa}$ | 445.1          | 334.81         | 279.43         | 347.49          | 458.95         | 435.28         |

Table S4.  $\text{Tan}\delta$  at 0 °C and 60 °C of ESBR vulcanizates filled with monodisperse silica modified by different dosage of Si747

| Sample                          | 8%-AS-R | 10%-AS-R | 12%-AS-R | 15%-AS-R | 20%-AS-R |
|---------------------------------|---------|----------|----------|----------|----------|
| $\text{Tan}\delta@0\text{ °C}$  | 0.2455  | 0.2460   | 0.2391   | 0.2662   | 0.2524   |
| $\text{Tan}\delta@60\text{ °C}$ | 0.1144  | 0.1137   | 0.1105   | 0.1095   | 0.1181   |

Table S5.  $\text{Tan}\delta$  at 0 °C and 60 °C of ESBR vulcanizates filled with precipitated silica modified by different dosage of Si747

| Sample                          | 10%-PS-R | 12%-PS-R | 15%-PS-R | 20%-PS-R |
|---------------------------------|----------|----------|----------|----------|
| $\text{Tan}\delta@0\text{ °C}$  | 0.2272   | 0.2370   | 0.2424   | 0.2553   |
| $\text{Tan}\delta@60\text{ °C}$ | 0.1313   | 0.1323   | 0.1287   | 0.1272   |

Table S6. The shear storage modulus difference  $\Delta G'$  of ESBR compounds filled with silica modified at different pH

| Sample                          | 15%-AS<br>@3-R | 15%-AS<br>@7-R | 15%-AS<br>@9-R | 15%-AS<br>@12-R | 20%-PS<br>@7-R | 20%-PS<br>@9-R |
|---------------------------------|----------------|----------------|----------------|-----------------|----------------|----------------|
| $\text{Tan}\delta@0\text{ °C}$  | 0.2270         | 0.2426         | 0.2533         | 0.2510          | 0.2238         | 0.2423         |
| $\text{Tan}\delta@60\text{ °C}$ | 0.1405         | 0.1214         | 0.1095         | 0.1112          | 0.1429         | 0.1287         |

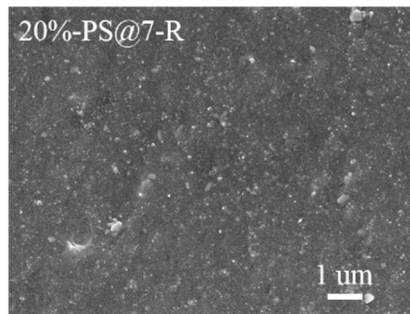

Figure S2. Fracture surface SEM micrographs of ESBR/PS vulcanizates with PS modified at different pH
